## TITLE PAGE

### *Research Letter*

# **High Burden of COVID-19 among Unvaccinated Law Enforcement Officers and Firefighters**

Alberto J. Caban-Martinez, D.O., Ph.D., M.P.H., Manjusha Gaglani, M.B.B.S., Lauren E.W. Olsho, PhD, Lauren Grant, M.S., Natasha Schaefer-Solle, Ph.D., R.N., Harmony L. Tyner, M.D., M.P.H., Sarang K. Yoon, D.O., Allison L. Naleway, Ph.D., Karen Lutrick, PhD, Jennifer Meece, PhD, Marilyn Odean, MS, Matthew S. Thiese, PhD, Jennifer L. Kuntz, PhD, Spencer Rose, BS, Meredith G. Wesley, M.P.H., Katherine D. Ellingson, Ph.D., Josephine Mak, M.P.H., Paola Louzado Feliciano, M.S., Karley Respet, B.S., Andrew L. Phillips, M.D., Holly C. Groom, M.P.H., Kayan Dunnigan, M.P.H., Kimberly Groover, Ph.D., Joe K. Gerald, M.D., Ph.D., Young M. Yoo, M.S.P.H., Roger Noriega, M.P.H., Jessica Lundgren, R.N., B.S.N., Kurt T. Hegmann, M.D., Michael Smith, B.S., Kimberly Groover, Ph.D., Julie Mayo Lamberte, M.S.P.H., Alexandra Cruz B.A., B.S., Angela Hunt, R.N., Matthew M. Bruner, B.S., Kempapura Murthy, MBBS, MPH, Laura J. Edwards, MPH, Ashley L. Fowlkes, Sc.D., M.P.H., Damena Gallimore-Wilson, B.A., Jennifer Viergutz, M.B.A., M.A., M.T., Rachel Brown, Ph.D., Leah Odame-Bamfo, M.P.H., Brian E. Sokol, M.S.P.A., Monica Dickerson, John M. Jones, B.S., Jenna Praggastis, B.S., Deanna E. Fleary, M.Sc., Preeta K. Kutty, M.D., Mark G. Thompson, Ph.D., and Jefferey L. Burgess, MD, MS, MPH

Leonard M. Miller School of Medicine, University of Miami, Miami (A.J.C.-M., N.S.S., P.L.F., R.N., A.C., D.G.W., J.M.J.); Baylor Scott and White Health, Temple, Texas, A&M University College of Medicine, Temple, Texas (M.G., S.R., K.D., M.S., K.M., L.O-B, ); St. Luke's Regional Health Care System, Duluth, MN (H.L.T., M.O., K.R., J.L., A.H., J.V.); University of Utah, Salt Lake City (S.K.Y., M.S.T., A.L.P., J.K.G., K.T.H., M.M.B., R.B., J.P.); Kaiser Permanente Northwest Center for Health Research, Portland, OR (A.L.N., J.L.K., H.C.G.); Abt Associates, Rockville, MD (L.E.W.O., M.G.W., K.G., L.J.E., B.E.S., D.E.F.); Centers for Disease Control and Prevention (M.G.T., L.G., J.M., Y.M.Y., J.M.L., A.L.F., M.D., P.K.K.); Marshfield Clinic Research Institute (J.M.), and Mel and Enid Zuckerman College of Public Health, University of Arizona, Tucson (J.L.B., K.L., K.D.E.).

**Corresponding Author:**

Alberto J. Caban-Martinez, DO, PhD, MPH

Department of Public Health Sciences

Leonard M. Miller School of Medicine

University of Miami, Miller School of Medicine

1120 N.W. 14th Street, Room #1025, Miami, Florida 33136

Phone: (305) 243-7565 | Fax: (305) 243-3651

Email: [acaban@med.miami.edu](mailto:acaban@med.miami.edu)

**Disclosures:** The other authors declare no potential conflicts of interest.

**Ethics Review:** This study is governed by Centers for Disease Control and Prevention IRB review board and gave ethical approval for this work. Ethics committee/IRB of University of

Arizona gave ethical approval for this work - Ethic committee/IRB of all RECOVER Abt sites (University of Utah, Baylor Scott & White, University of Miami, St Luke's, and Kaiser Permanente) gave ethical approval for this work - Ethics committee/IRB of Centers for Disease Control and Prevention deferred to RECOVER Abt sites and University of Arizona for this work

**Disclaimers:** The findings and conclusions in this paper are those of the authors and do not necessarily represent the views of the collaborating institutions

Letter Word Count: 599 / 600

Tables: 1

References: 6

## ABSTRACT

Law Enforcement Officers (LEOs), firefighters, and other first responders are at increased risk of SARS-CoV-2 infection compared to healthcare personnel but have relatively low COVID-19 vaccine uptake. Resistance to COVID-19 vaccine mandates among first responders has the potential to disrupt essential public services and threaten public health and safety. Using data from the HEROES-RECOVER prospective cohorts, we report on the increased illness burden of COVID-19 among unvaccinated first responders. From January to September 2021, first responders contributed to weekly active surveillance for COVID-19-like illness (CLI). Self-collected respiratory specimens collected weekly, irrespective of symptoms, and at the onset CLI were tested by Reverse Transcription Polymerase Chain Reaction (RT-PCR) assay for SARS-CoV-2. Among 1415 first responders, 17% were LEOs, 68% firefighters, and 15% had other first responder occupations. Unvaccinated (41%) compared to fully vaccinated (59%) first responders were less likely to believe COVID-19 vaccines are very or extremely effective (17% versus 54%) or very or extremely safe (15% versus 54%). From January through September 2021, among unvaccinated LEOs, the incidence of COVID-19 was 11.9 per 1,000 person-weeks (95%CI=7.0-20.1) compared to only 0.6 (95%CI=0.2-2.5) among vaccinated LEOs. Incidence of COVID-19 was also higher among unvaccinated firefighters (9.0 per 1,000 person-weeks; 95%CI=6.4-12.7) compared to those vaccinated (1.8 per 1,000; 95%CI=1.1-2.8). Once they had laboratory-confirmed COVID-19, unvaccinated first responders were sick for a mean $\pm$ SD of 14.7 $\pm$ 21.7 days and missed a mean of 38.0 $\pm$ 46.0 hours of work. These findings suggest that state and local governments with large numbers of unvaccinated first responders may face major disruptions in their workforce due to COVID-19 illness.

## LETTER TEXT

Law Enforcement Officers (LEOs), firefighters, and other first responders are at increased risk of SARS-CoV-2 infection compared to healthcare personnel,<sup>1,2</sup> but have relatively low COVID-19 vaccine uptake. COVID-19 was the leading cause of line-of-duty deaths among LEOs in the United States from January through November 2021, accounting for 276 (65.7%) of 420 deaths.<sup>3</sup> Resistance to COVID-19 vaccine mandates among first responders has the potential to disrupt essential public services and threaten public health and safety. Using data from the HEROES-RECOVER prospective cohorts, we report on the increased illness burden of COVID-19 among unvaccinated first responders.

Detailed methods of the prospective HEROES-RECOVER cohorts in 6 States are published previously.<sup>4-6</sup> From January to September 2021, first responders contributed to weekly active surveillance for COVID-19-like illness (CLI). Self-collected respiratory specimens collected weekly, irrespective of symptoms, and at the onset CLI were tested by Reverse Transcription Polymerase Chain Reaction (RT-PCR) assay for SARS-CoV-2. Socio-demographic characteristics, attitudes toward COVID-19 vaccines, and information on the duration of illness and missed work associated with COVID-19 were collected via electronic surveys.

Among 1415 first responders, 17% were LEOs, 68% firefighters, and 15% had other first responder occupations (**Table**). Mean age ( $\pm$ SD) was 41.3 $\pm$ 9.7 years. Most participants were male (79%), White race (95%), and non-Hispanic (71%). Unvaccinated (41%) compared to fully vaccinated (59%) first responders were less likely to believe COVID-19 vaccines are very or extremely effective (17% versus 54%) or very or extremely safe (15% versus 54%). Only one-third (35%) of 1163 first responders who completed an attitude survey said they trusted what the

government says about the COVID-19 vaccines; this percentage among 363 unvaccinated first responders was even lower (12%).

A total of 184 COVID-19 illnesses with RT-PCR-confirmed SARS-CoV-2 infection (COVID-19) were identified among first responders before and after COVID-19 vaccines became available in mid-December 2020. From January through September 2021, among unvaccinated LEOs, the incidence of COVID-19 was 11.9 per 1,000 person-weeks (95% CI=7.0-20.1) compared to only 0.6 (95% CI=0.2-2.5) among vaccinated LEOs. Incidence of COVID-19 was also higher among unvaccinated firefighters (9.0 per 1,000 person-weeks; 95% CI=6.4-12.7) compared to those vaccinated (1.8 per 1,000; 95% CI=1.1-2.8). Once they had laboratory-confirmed COVID-19, unvaccinated first responders were sick for a mean $\pm$ SD of 14.7 $\pm$ 21.7 days and missed a mean of 38.0 $\pm$ 46.0 hours of work. Duration of COVID-19 illness and missed work were lower among fully vaccinated first responders.

During the study period, LEOs and firefighters who remained unvaccinated were 20- and 5-times more likely, respectively to become sick with COVID-19 than their colleagues who were fully vaccinated against COVID-19. On average, first responders were sick with COVID-19 for over 2 weeks and missed close to 40 hours of work due to their illness. Although this is among the largest prospective studies of its kind,<sup>4-6</sup> the relatively small number of COVID-19 illnesses among fully vaccinated participants limited the precision of estimates and precluded models of incidence that could adjust for potential confounders. Nonetheless, these findings suggest that state and local governments with large numbers of unvaccinated first responders may face major disruptions in their workforce due to COVID-19 illness. Workplace requirements for employees to be vaccinated against COVID-19 have been established for healthcare workers. Given that COVID-19 vaccines have proven highly effective in controlling COVID-19 and its variants to

date, during this public health emergency, state and local governments should consider vaccine mandates for first responders with a particular focus on LEOs, and regular COVID-19 testing or alternative work assignments for unvaccinated personnel. The low trust in government among first responders in this cohort additionally suggests a need to develop alternate strategies relying on trusted non-governmental information sources to increase vaccination rates.

## REFERENCES

1. Ellingson KD, Gerald JK, Sun X, et al. Incidence of SARS-CoV-2 Infection Among Health Care Personnel, First Responders, and Other Essential Workers During a Prevaccination COVID-19 Surge in Arizona. JAMA Health Forum. 2021;2(10):e213318-e213318. DOI: 10.1001/jamahealthforum.2021.3318 %J JAMA Health Forum.
2. Baker MG, Peckham TK, Seixas NSJPo. Estimating the Burden of United States Workers Exposed to Infection or Disease: A Key Factor in Containing Risk of COVID-19 Infection. PLoS ONE 15(4): e0232452. (In eng). DOI: 10.1371/journal.pone.0232452.
3. Officer Down Memorial. Honoring officers killed in 2021. Officer Down Memorial Page, Inc., (ODMP) 2021. (Accessed November 15, 2021, at <https://www.odmp.org/search/year?year=2021>.)
4. Thompson MG, Burgess JL, Naleway AL, et al. Prevention and Attenuation of Covid-19 with the BNT162b2 and mRNA-1273 Vaccines. The New England Journal of Medicine. 2021;385(4):320-329. (In eng). DOI: 10.1056/NEJMoa2107058.
5. Edwards LJ, Fowlkes AL, Wesley MG, et al. Research on the Epidemiology of SARS-CoV-2 in Essential Response Personnel (RECOVER) Study: Protocol for a Multi-site Longitudinal Cohort. JMIR Research Protocols. 2021;10.2196/31574. (In eng). DOI: 10.2196/31574.
6. Lutrick K, Ellingson KD, Baccam Z, et al. COVID-19 Infection, Reinfection, and Vaccine Effectiveness in a Prospective Cohort of Arizona Frontline/Essential Workers: The AZ HEROES Research Protocol. JMIR Research Protocols. 2021;10(6):e28925. 2021 (In eng). DOI: 10.2196/289252021.



**Table.** Socio-demographic characteristics of first responders, their attitudes toward COVID-19 vaccines, and incidence and characteristics of laboratory-confirmed COVID-19 illness during the January to September 2021 study period

| Socio-Demographic Characteristics                                                          | Total         | Unvaccinated    | Fully Vaccinated <sup>a</sup> | Standard Mean Difference <sup>b</sup> |
|--------------------------------------------------------------------------------------------|---------------|-----------------|-------------------------------|---------------------------------------|
| <b>Total Participants<sup>c,†</sup></b>                                                    | <b>1415</b>   | <b>586 (41)</b> | <b>829 (59)</b>               |                                       |
| <b>Cohort location, n (%)</b>                                                              |               |                 |                               |                                       |
| Arizona                                                                                    | 692 (49)      | 265 (45)        | 427 (52)                      | 0.63                                  |
| Florida                                                                                    | 519 (37)      | 291 (50)        | 228 (28)                      |                                       |
| Oregon                                                                                     | 42 (3)        | 4 (1)           | 38 (5)                        |                                       |
| Minnesota                                                                                  | 35 (2)        | 2 (0)           | 33 (4)                        |                                       |
| Texas                                                                                      | 34 (2)        | 12 (2)          | 22 (3)                        |                                       |
| Utah                                                                                       | 93 (7)        | 12 (2)          | 81 (10)                       |                                       |
| <b>Demographic Characteristics</b>                                                         |               |                 |                               |                                       |
| Male Sex, n (%)                                                                            | 1113 (79)     | 462 (79)        | 651 (79)                      | 0.01                                  |
| White Race, n (%)                                                                          | 1338 (95)     | 554 (95)        | 784 (95)                      | 0.00                                  |
| Hispanic, n (%)                                                                            | 416 (29)      | 190 (32)        | 226 (27)                      | 0.11                                  |
| Age, Mean ± SD                                                                             | 41.3 ± 9.7    | 38.8 ± 9.7      | 43.1 ± 9.4                    | 0.46                                  |
| <b>Occupation, n (%)</b>                                                                   |               |                 |                               |                                       |
| Firefighters                                                                               | 964 (68)      | 419 (72)        | 545 (66)                      | 0.15                                  |
| Law Enforcement Officers                                                                   | 238 (17)      | 81 (14)         | 157 (19)                      |                                       |
| Other First Responders <sup>d</sup>                                                        | 213 (15)      | 86 (15)         | 127 (15)                      |                                       |
| <b>Attitudes toward COVID-19 Vaccine</b>                                                   |               |                 |                               |                                       |
| Total who completed survey, n (%) <sup>e</sup>                                             | 1163 (88)     | 363 (73)        | 800 (97)                      |                                       |
| Believe vaccine is very or extremely effective                                             | 491 (42)      | 61 (17)         | 430 (54)                      | 1.01                                  |
| Believe vaccine is very or extremely safe                                                  | 489 (42)      | 54 (15)         | 435 (54)                      | 1.10                                  |
| Trust what government says about the vaccine                                               | 406 (35)      | 45 (12)         | 361 (45)                      | 0.91                                  |
| <b>Incidence and Characteristics of Laboratory-confirmed COVID-19 Illness</b>              |               |                 |                               |                                       |
| <b>Laboratory-confirmed COVID-19 illnesses</b>                                             |               |                 |                               |                                       |
| Total COVID-19 illnesses                                                                   | 184           | 160             | 24                            |                                       |
| Prior to vaccine availability <sup>f</sup>                                                 | 103 (56)      | 103 (100)       | NA                            |                                       |
| During vaccine availability <sup>f</sup>                                                   | 81 (44)       | 57 (70)         | 24 (30)                       |                                       |
| <b>Laboratory-confirmed COVID-19 Incidence per 1,000 person-weeks (95% CI)<sup>f</sup></b> |               |                 |                               |                                       |
| Firefighters                                                                               | 4.0 (3.0-5.3) | 9.0 (6.4-12.7)  | 1.8 (1.1-2.8)                 |                                       |
| Law Enforcement Officers                                                                   | 2.8 (1.3-5.8) | 11.9 (7.0-20.1) | 0.6 (0.2-2.5)                 |                                       |
| Other First Responders                                                                     | 5.0 (3.0-8.3) | 8.7 (4.6-16.4)  | 2.9 (1.3-6.3)                 |                                       |
| Duration of COVID-19 illnesses, Mean days ± SD <sup>g</sup>                                | 12.1 ± 21.7   | 14.7 ± 21.7     | 9.6 ± 14.5                    | 0.28                                  |
| Missed work due to COVID-19, Mean hours ± SD <sup>g</sup>                                  | 26.7 ± 40.0   | 38.0 ± 46.0     | 11.9 ± 22.7                   | 0.72                                  |

- Fully COVID-19 vaccinated participants by vaccine product: 286 received 2 doses of BNT162b2 (Pfizer–BioNTech), 523 received 2 doses of mRNA-1273 (Moderna), and 20 received 1 dose of Ad26.COV2.S (Johnson & Johnson–Janssen); 71 who remained partially vaccinated (days 1-13 after a dose of Ad26.COV2.S or any day after either messenger RNA vaccine but prior to 14 days after dose-2) were excluded from analysis. Unvaccinated individuals self-reported that they had not received a dose of COVID-19 vaccine in weekly surveillance messages and in electronic or telephone surveys conducted every 4-6 weeks.
- Standardized mean or proportion difference between unvaccinated and fully vaccinated participants of more than 0.2 was considered noteworthy.
- Total participants include all self-identified first responders, who were fully enrolled, participated in active surveillance for COVID-19-like illness, and were documented as fully COVID-19 vaccinated or documented as unvaccinated.
- Other first responders included non-fire emergency medical services (N= 141), corrections (N= 51), and other (N= 21).
- Of 252 of 1415 (17.8%) participants missing the attitude survey, 88 unvaccinated and 1 vaccinated participant discontinued the study prior to the administration of the attitude survey; the remaining 135 unvaccinated and 28 vaccinated participants failed to complete the attitude survey. Each attitude had 5 response options. Effectiveness and safety compare "extremely or very" with "somewhat", "not too", or "not at all". Trust item compares "strongly agree" or "mildly agree" with "neutral", "mildly disagree", or "strongly disagree".
- Incidence rates were calculated for the period from January through September 2021 using a Poisson GEE with occupation and vaccination status in the model and log weeks as an offset. The outcome was a SARS-CoV-2 positive COVID-19-like illness. Participants were limited to those without documentation of prior SARS-CoV-2 infection by molecular assay at the start of January 2021 and contributed to active surveillance during this period. Person-time was censored after the illness onset date of a SARS-CoV-2 infection.
- Among total laboratory-confirmed COVID-19 illnesses
